# Supplementary material for: Integration of Global Signaling Pathways, cAMP-PKA, MAPK and TOR in the Regulation of FLO11
Source: PubMed Central journal article supplement (PMC2246015; doi:10.1371/journal.pone.0001663), 2008-02-27

**Figure S1** Schematic representation of cAMP and MAPK pathways. The network was characterized into four different modules. *Module 1*: Upstream regulation of Mep2 by ammonium sulphate concentration. *Module 2*: Ras2 activation involving Cdc25 and Ira1, where Ira1 is regulated by Mep2 and Cdc25 by Kss1 of MAPK cascade. *Module 3*: upstream regulation of Gpa2 by Mep2, which involves removal of Gpb1/2 inhibition. *Module 4*: A network comprising of cAMP and MAPK pathways

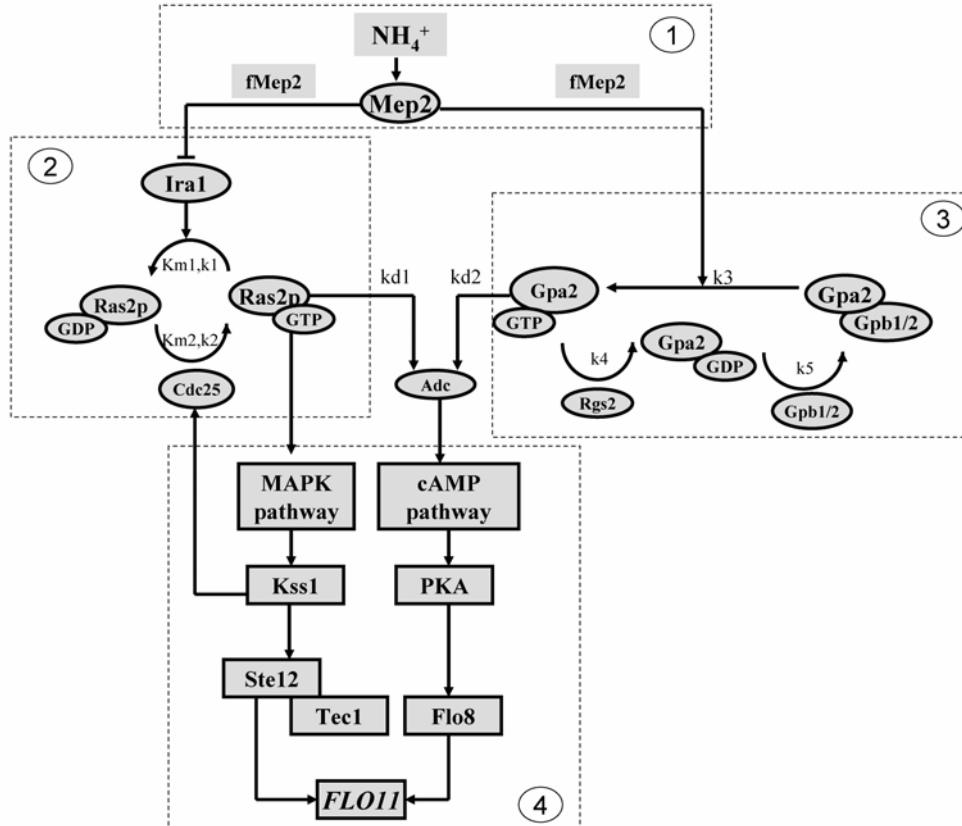

Supplement: pone.0001663.s001.pdf [file pone.0001663.s001.pdf]
