# Supplementary material for: Integration of Global Signaling Pathways, cAMP-PKA, MAPK and TOR in the Regulation of FLO11
Source: PubMed Central journal article supplement (PMC2246015; doi:10.1371/journal.pone.0001663), 2008-02-27

**Figure S2** Schematic representation for TOR mediated control of G1 cyclins and Msn2/4 nuclear translocation. Tor controls the synthesis of G1 cyclin by controlling the translational initiation of *CLN3* mRNA. Cln3 activates SBF, a transcriptional activator of Cln1/2. SBF is inactivated by mitotic cyclin, Clb2. Tor negatively regulates the phosphatase Pph21/22 under nitrogen rich condition, which is required to decrease the export rate of Msn2/4 from the nucleus. The term Tpk represents the input from cAMP pathway, which is required to decrease the import rate and increase the export rate.

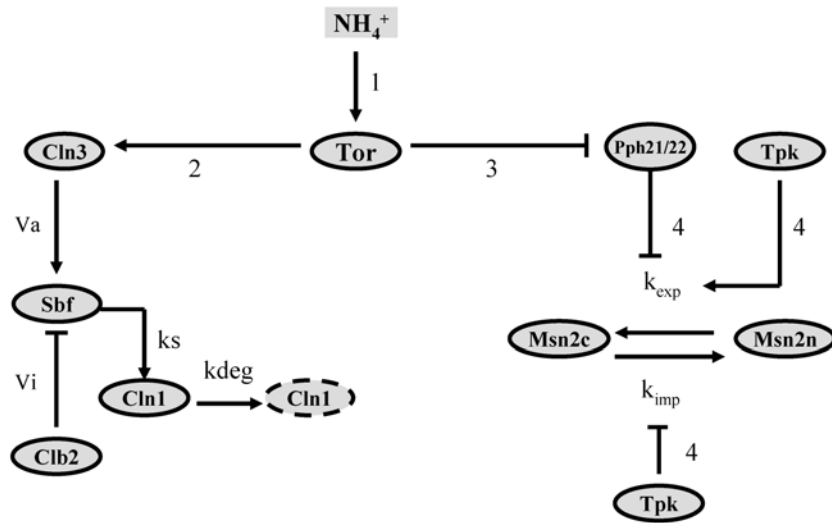

Supplement: pone.0001663.s002.pdf [file pone.0001663.s002.pdf]
