# Supplementary material for: Integration of Global Signaling Pathways, cAMP-PKA, MAPK and TOR in the Regulation of FLO11
Source: PubMed Central journal article supplement (PMC2246015; doi:10.1371/journal.pone.0001663), 2008-02-27

**Figure S3** Multiple roles of *Tor* in control of vegetative growth, filamentous growth and starvation response. *Tor* controls vegetative growth through a subsensitive response, filamentous growth through a bistable response and STRE (starvation) response by remaining switched off (solid line). *Tor* switches between these states depending upon the availability of nitrogen source. Dotted line indicates the case without negative feedback on *Tor* activity.

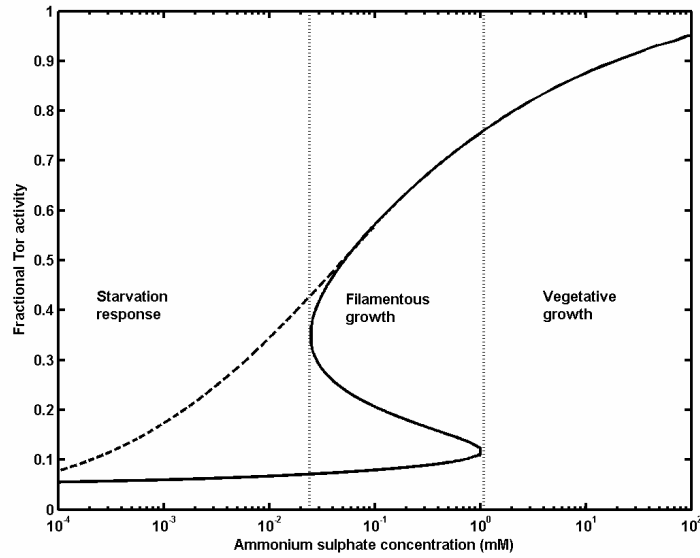

Supplement: pone.0001663.s003.pdf [file pone.0001663.s003.pdf]
