# Supplementary material for: Integration of Global Signaling Pathways, cAMP-PKA, MAPK and TOR in the Regulation of FLO11
Source: PubMed Central journal article supplement (PMC2246015; doi:10.1371/journal.pone.0001663), 2008-02-27
Supplement: pone.0001663.s005.pdf [file pone.0001663.s005.pdf]

**Text S1:** Steady state equations and relevant parameters for cAMP-PKA, MAPK and TOR pathways.

**Steady state equations for upstream regulation of cAMP and MAPK pathways by Mep2.**

(1) Fractional activation of Mep2 by ammonium sulphate (Figure S1, Module1)

$$f_{Mep2} = \left( \frac{Am^{nH8}}{K^{nH8} + Am^{nH8}} \right) \times \left( \frac{K_9^{nH9}}{K_9^{nH9} + Am^{nH9}} \right)$$

(2) Ras2 activation module involving cdc25p and Ira1 (Figure S1, Module 2)

$$\frac{k1 \times Ras2GTP \times Ira1}{Km1} = \frac{k2 \times Ras2GDP \times Cdc25}{Km2}$$

Activated Mep2 function to destabilize Ira1 by inactivating Gpb1/2, thereby reduces the active Ira1 concentration. Here, we assume that the total concentration of Ira1 is affected with activation of Mep2, which is given by  $Ira1_t = f_{Mep2} \times Ira1_{max}$ .

(3) Gpa2 regulation by Mep2 (Figure S1, Module 3)

$$k3 \times G\alpha\beta\gamma \times RL = k4 \times G\alpha GTP \times Rgs2$$

$$k4 \times G\alpha GTP \times Rgs2 = k5 \times G\alpha GDP \times G\beta\gamma$$

These equations represent the regulation of GPCR by binding of ligand to the receptor. Here,  $G\alpha\beta\gamma$  represents Gpa2-Gpb1/2 complex,  $G\alpha GTP$  represents Gpa2GTP,  $G\beta\gamma$  represents Gpb1/2 and  $G\alpha GDP$  represents Gpa2GDP. RL represents the receptor-ligand complex. Here, RL represents the Mep2 activated by ammonium sulphate.

**Steady state equations relevant to cAMP and MAPK pathways (Figure S1, Module 4) were taken from our previous work [1].**

---

| <i>Reaction description</i>    | <i>Equation</i>                                                |
|--------------------------------|----------------------------------------------------------------|
| <i>Flo8 activation by Tpk2</i> | $\frac{k11}{Km11} [Flo8][Tpk2] = \frac{k22}{Km22} [Flo8p][E2]$ |

---

***Pde1p activation***

$$\frac{k13}{Km13}[Pde1][TpK2] = \frac{k14}{Km14}[Pde1p][E14]$$

***cAMP rate balance***

$$\begin{aligned} & k16[Adc\_a] \\ &= \frac{k14}{Km14}[Pde2][cAMP] + \frac{k15}{Km15}[Pde1p][cAMP] \end{aligned}$$

***Cdc25 activation***

$$\frac{k24}{Km24}[Cdc25][Kss1p] = \frac{k25}{Km25}[Cdc25p][E25]$$

***Dig1/2 inactivation***

$$\frac{k26}{Km26}[Dig1/2][Kss1p] = \frac{k27}{Km27}[Dig1/2p][E27]$$

***Ste12Tec1 activation***

$$\frac{k28}{Km28}[Ste12Tec1][Kss1p] = \frac{k29}{Km29}[Ste12pTec1p][E29]$$

***Ste12Tec1\_Dig1/2\_kss1 complex phosphorylation by Ste7pp (MAPK activation by MAPKK)***

$$\begin{aligned} & \frac{k31}{Km31}[Ste12Tec1\_Dig1/2\_Kss1][Ste7pp] \\ &= \frac{k32}{Km32}[Ste12Tec1\_Dig1/2\_Kss1p][E32] \end{aligned}$$

***Ste7 (MAPKK) activation by Ste20 (MAPKKK)***

$$\frac{k34}{Km34}[Ste11p\_Ste50][Ste7p] = \frac{k35}{Km35}[Ste7pp][E35]$$

***Ste7p (MPKK) activation by Ste20 (MAPKKK)***

$$\frac{k36}{Km36}[Ste11p\_Ste50][Ste7] = \frac{k37}{Km37}[Ste7p][E37]$$

***Ste11 (MAPKKK) activation by Ste20 complex (MAPKKKK)***

$$\begin{aligned} & \frac{k38}{Km38}[Ste20\_Cdc42GTP\_Bmh1/2][Ste11\_Ste50] \\ &= \frac{k39}{Km39}[Ste11p\_Ste50][E39] \end{aligned}$$

***Cdc42 activation by Cdc24p***

$$\begin{aligned} & \frac{k43}{Km43}[Cdc42GDP][Cdc24p] \\ &= \frac{k44}{Km44}[Cdc42GTP][Rga1] \end{aligned}$$

---

- Nomenclature: If a protein is ‘A’ and another protein is ‘B’ then ‘A\_B’ represents the complex between ‘A’ and ‘B’. Also, ‘Ap’ represents the activated protein (phosphorylated). Ei represents a phosphatase.
- Relevant parameters (**Rate constants, Michaelis Menten constant, total concentrations and disassociation constants**) for the module cAMP and MAPK (Module 4) were taken from Sengupta et al 2007 [1].

### Steady state equations for TOR mediated control of G1 cyclins and Msn2/4 translocation (Figure S2)

(1) *Fractional activation of TOR by ammonium sulfate*

$$f_{TOR} = \left( \frac{Am^{nH4}}{K_4^{nH4} + Am^{nH4}} \right)$$

(2) *Translational control of Cln3 by TOR*

$$C \ln 3 = C \ln 3_{\max} \left( \frac{TOR^{nH14}}{K_{14}^{nH14} + TOR^{nH14}} \right)$$

(3) *Inactivation of Phosphatase Pph21/22 by TOR*

$$Pph21/22 = Pph21/22_{\max} \left( \frac{K_{13}^{nH13}}{K_{13}^{nH13} + TOR^{nH13}} \right)$$

(4) *Control of nuclear translocation of Msn2/4 by Pph21/22 and Tpk*

$$Msn2/4_{cyc} \times K_{imp} \times \underbrace{\left( \frac{K_{10}^{nH10}}{Tpk^{nH10} + K_{10}^{nH10}} \right)}_{term1} = Msn2/4_{nuc} \times K_{exp} \times \underbrace{\left( \frac{K_{11}^{nH11}}{K_{11}^{nH11} + Pph21/22^{nH11}} \right)}_{term2} \times \left( \frac{Tpk^{nH12}}{K_{12}^{nH12} + Tpk^{nH12}} \right)$$

(5) *Sbf activation and inactivation by Cln3 and Clb2, respectively*

$$V_a = k_{sbf} \times C \ln 3$$

$$V_i = k_{isbf} + k_i \times Clb2$$

$$k_{sbf} \times C \ln 3 - (k_{isbf} + k_i \times Clb2) \times Sbf = 0$$

(6) *Sbf mediated synthesis and degradation of G1 cyclin Cln1/2*

$$k_s \times Sbf - k_{deg} \times C \ln 1 = 0$$

---

| <i>Species</i>                     | <i>Total molar balances</i>                                                                                                                                                                                                                              |
|------------------------------------|----------------------------------------------------------------------------------------------------------------------------------------------------------------------------------------------------------------------------------------------------------|
| <i>Ras2t</i>                       | = <i>Ras2GTP</i> + <i>Ras2GDP</i> + <i>Ras2GDP_Cdc25p</i> + <i>Ras2GTP_Ira1</i>                                                                                                                                                                          |
| <i>Irat</i>                        | = <i>Ira1</i> + ( <i>Ras2GTP</i> )( <i>Ira1</i> ) / <i>Km1</i>                                                                                                                                                                                           |
| <i>Gat</i>                         | = <i>Gαβγ</i> + <i>GαGTP</i> + <i>GαGDP</i> + <i>Adc_GαGTP</i>                                                                                                                                                                                           |
| <i>Gβγt</i>                        | = <i>Gβγ</i> + <i>Gαβγ</i>                                                                                                                                                                                                                               |
| <i>Msn2t</i>                       | = <i>Msn2nuc</i> + <i>Msn2cyc</i>                                                                                                                                                                                                                        |
| <i>Adct</i>                        | = <i>Adc</i> + <i>Adc_GαGTP</i> + <i>Adc_Ras2GTP</i>                                                                                                                                                                                                     |
| <i>Flo8t</i>                       | = <i>Flo8</i> + <i>Flo8p</i>                                                                                                                                                                                                                             |
| <i>E2t</i>                         | = <i>E2</i> + <i>Flo8p_E2</i>                                                                                                                                                                                                                            |
| <i>Pde1t</i>                       | = <i>Pde1</i> + <i>Pde1p-Camp</i> + <i>Pde1p</i> + <i>Pde1p_E12</i> + <i>Pde1_C</i>                                                                                                                                                                      |
| <i>R<sub>2</sub>C<sub>2</sub>t</i> | = 2. <i>R<sub>2</sub>C<sub>2</sub></i> + 2 <i>R<sub>2</sub>(Camp)<sub>4</sub></i>                                                                                                                                                                        |
| <i>Pde2t</i>                       | = <i>Pde2</i> = <i>Pde2t</i> /(1+ [ <i>Camp</i> ]/ <i>Km</i> (2))                                                                                                                                                                                        |
| <i>Ct</i>                          | = 2 <i>R<sub>2</sub>C<sub>2</sub></i> + <i>C</i> + <i>Pde1_C</i>                                                                                                                                                                                         |
| <i>Ste12tec_t</i>                  | = <i>Kss1_Dig12_Ste12Tec1</i> + <i>Kss1p_Dig12_Ste12Tec1</i> + <i>Ste12Tec1</i> +<br><i>Ste12Tec1p</i> + <i>Ste12Tec1_Kss1p</i> + <i>Ste12pTec1p_E29</i>                                                                                                 |
| <i>Kss1t</i>                       | = <i>Kss1p_Dig12_Ste12Tec1</i> + <i>Kss1p</i> + <i>Kss1_Dig12_Ste12Tec1</i> + <i>Kss1</i> +<br><i>Ste12Tec1_Kss1p</i> + <i>Kss1p_Dig12_Ste12Tec1_E32</i> +<br><i>Kss1_Dig12_Ste12Tec1_Ste7p</i> + <i>Kss1p_Dig12</i> + <i>Cdc25_Kss</i> + <i>Kssfus3</i> |
| <i>Dig12t</i>                      | = <i>Dig12p</i> + <i>Dig12</i> + <i>Kss1_Dig12_Ste12Tec1</i> + <i>Kss1p_Dig12_Ste12Tec1</i> +<br><i>Kss1p_Dig12_Ste12Tec1_E32</i> + <i>Kss1_Dig12_Ste12Tec1_Ste7pp</i> +<br><i>E27_Dig12p</i> + <i>Dig12_Kss1p</i>                                       |
| <i>Cdc25t</i>                      | = <i>Cdc25p</i> + <i>Cdc25</i> + <i>Cdc25_Kss</i> + <i>Cdc25_Fus3</i> + <i>Cdc25_Kss1p</i> +<br><i>Cdc25p_E10</i>                                                                                                                                        |

---

---


$$\begin{aligned}
Fus3t &= Fus3 + Cdc25\_Fus3 + Kssfus3 \\
E35t &= E35 + (Ste7pp)(E35)/Km(2) \\
E37t &= E37 + (Ste7p)(E37)/Km(4) \\
E39t &= E39 + (Ste7p)(E39)/Km(6) \\
Ste7t &= Ste7 + Ste7pp + Ste7p \text{ (intermediate complexes are neglected)} \\
Ste11ste50t &= Ste11ste50 + Ste11pste50 \\
Ste20t &= Ste20\_Hl7p + Ste20 + Cdc42p\_Ste20\_Bmh + Cdc42p\_Ste20\_Bmh \\
Hl7pt &= Hl7p + Ste20\_Hl7p \\
Rga1pt &= Rga1p + Cdc42pGTP\_Rga1p \\
Cdc42pt &= Cdc42p\_Gtp + Cdc42pGtp\_Ste20 + Cdc42p\_Ste20\_Bmh + Cdc42p\_Gdp + \\
&\quad Cdc24p\_Cdc42pGdp + Rga1p\_Cdc42pGtp
\end{aligned}$$


---

**Relevant parameters (Rate constant, Michaelis Menten constant, total concentration and disassociation constant) for TOR pathway and Modules 1, 2 and 3 of Figure S1.**

**Component Concentrations (nM)**

---

| <i>Species</i> | <i>Conc. (nM)</i> | <i>Reference</i> | <i>Species</i> | <i>Conc.(nM)</i> | <i>Reference</i> |
|----------------|-------------------|------------------|----------------|------------------|------------------|
| Pph21/22       | 160*              | [4]              | Adc            | 40               | [2]              |
| Msn2           | 2                 | [4]              | Ira            | 30               | [1]              |
| Tor1           | 15                | [4]              | Sbf            | 50               | [3]              |
| Cln3           | 50                | [3]              | Rgs2           | 50               | [2]              |
| Cln1/2         | 50                | [3]              | Gβα            | 75               | [4]              |
| Clb2           | 50                | [3]              | Mep2           | 50               | [4]              |
| Gα             | 75                | [4]              | Ras2           | 200              | [2]              |

Unknown concentrations were calculated from molecules numbers obtained from Yeast GFP fusion localization database (<http://yeastgfp.ucsf.edu>) [4]. Molecule numbers were converted into nM by considering a cell volume of 100fL

\* Only 10% of Pph21/22 is actually involved in the TOR signaling [5].

### *Rate constants*

| <i>Nomenclature</i> | <i>Value (min<sup>-1</sup>)</i> | <i>Reference</i> | <i>Nomenclature</i> | <i>Value (min<sup>-1</sup>)</i> | <i>Reference</i> |
|---------------------|---------------------------------|------------------|---------------------|---------------------------------|------------------|
| k1                  | 36                              | [7]              | kasbf               | 0.38                            | [3]              |
| k2                  | 12                              | [7]              | ki                  | 8                               | [3]              |
| k3                  | 0.5                             | [2]              | kisbf               | 0.8                             | [3]              |
| k4                  | 4                               | [2]              | ks                  | 0.15                            | [3]              |
| k5                  | 2.5                             | [2]              | kdeg                | 0.12                            | [3]              |
| kimp                | 1                               | [assumed]        | kexp                | 1                               | [assumed]        |

### *Dissociation constants*

### *Michaelis Menten constants*

| <i>Kd</i> | <i>Value (nM)</i> | <i>Reference</i> | <i>Km</i> | <i>Value (nM)</i> | <i>Reference</i> |
|-----------|-------------------|------------------|-----------|-------------------|------------------|
| kd1       | 10                | [6]              | Km1       | 250               | [7]              |
| kd2       | 2                 | [2]              | Km2       | 160               | [7]              |

### *Hills Coefficient*

| <i>nH</i> | <i>value</i> | <i>Reference</i> | <i>nH</i> | <i>value</i> | <i>Reference</i> |
|-----------|--------------|------------------|-----------|--------------|------------------|
| nH1       | 4            | [1]              | nH9       | 2            | [calculated]     |
| nH2       | 0.8          | [1]              | nH10      | 2            | [assumed]        |

|     |       |              |      |           |              |
|-----|-------|--------------|------|-----------|--------------|
| nH3 | 3 - 4 | [calculated] | nH11 | 3 - 4     | [calculated] |
| nH4 | 0.3   | [calculated] | nH12 | 2         | [assumed]    |
| nH5 | 2- 3  | [calculated] | nH13 | 0.9 - 1.2 | [calculated] |
| nH6 | 4     | [1]          | nH14 | 2         | [calculated] |
| nH7 | 0.8   | [1]          |      |           |              |
| nH8 | 1- 2  | [calculated] |      |           |              |

---

| <i>K0.5</i> | <i>Value (nM)</i> | <i>Reference</i> | <i>K0.5</i> | <i>Value(nM)</i> | <i>Reference</i> |
|-------------|-------------------|------------------|-------------|------------------|------------------|
| K1          | 67                | [1]              | K9          | 1000*            | [calculated]     |
| K2          | 10                | [1]              | K10         | 10               | [assumed]        |
| K3          | 2.5               | [calculated]     | K11         | 3                | [calculated]     |
| K4          | 15-30*            | [calculated]     | K12         | 10               | [assumed]        |
| K5          | 5                 | [calculated]     | K13         | 2                | [calculated]     |
| K6          | 14                | [1]              | K14         | 7.5              | [calculated]     |
| K7          | 2                 | [1]              |             |                  |                  |
| K           | 2-16 *            | [calculated]     |             |                  |                  |

\* Units in  $\mu\text{M}$  based on the extracellular ammonium sulphate concentration

## References

1. Sengupta N, Vinod PK, Venkatesh KV (2007) Crosstalk between cAMP-PKA and MAP kinase pathways is a key regulatory design necessary to regulate *FLO11* expression. *Biophys Chem* 125:59-71.
2. Bhalla US (2002) Use of Kinetikit and GENESIS for modeling signaling pathways, *Methods Enzymol.* 345: 3–23.
- 3.. Chen, KC, Calzone L, Csikasz-Nagy A, Cross FR, Novak B, Tyson JJ (2004) Integrative analysis of cell cycle control in budding yeast. *Mol Biol Cell* 15:3841-3862.

4. Ghaemmaghami S, Huh WK, Bower K, Howson R W, Belle A, Dephoure N, O'Shea EK, Weissman JS (2003) Global analysis of protein expression in yeast *Nature*. 425: 737-741.
5. DiComo CJ, Arndt KT (1996) Nutrients, via the Tor proteins, stimulate the association of Tap42 with type 2A phosphatases. *Genes & Dev* 10: 1904-1916.
6. Shima F, Yuriko YK, Yanagihara C, Tamada M, Tomoyo O, Kariya K, Kataoka T (1997) Effect of association with adenylyl cyclase-associated protein on the interaction of yeast adenylyl cyclase with Ras protein, *Mol Cell Biol* 17: 1057–1064.
7. Steven AH, Broach JR (1997) Cdc25p, the guanine nucleotide exchange factor for the Ras proteins of *Saccharomyces cerevisiae*, promotes exchange by stabilizing Ras in a nucleotide-free state. *J Biol Chem* 269: 16541–16548.
